# Supplementary material for: An isoform quantitative trait locus in SBNO2 links genetic susceptibility to Crohn’s disease with defective antimicrobial activity
Source: PubMed Central journal article supplement (PMC11133462; doi:10.1038/s41467-024-47218-3), 2024-05-28
Supplement: 41467_2024_47218_MOESM1_ESM.pdf [file 41467_2024_47218_MOESM1_ESM.pdf]

# Supplementary Figure 1

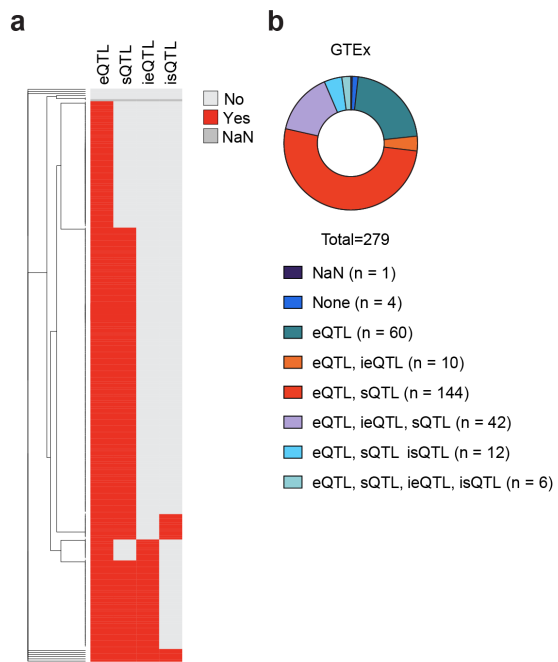

Supplementary Figure 1: GTEx eQTL, sQTL, ieQTL, and isQTL analysis of confident GWAS IBD genes. (a) Heatmap presentation of the presence or absence of GTEx eQTL, sQTL, ieQTL, and isoQTL across confident GWAS IBD genes<sup>2</sup> (n = 279, Bolton C. et al., *Gastroenterology* 2022, Supplementary Table 4: Genes included in the analysis of the intersection of monogenic IBD genes and polygenic IBD loci). (b) Pie chart presentation of numbers of confident GWAS IBD genes according to (a). Source data are provided as a Source Data file for Supplementary Figure 1a.

## Supplementary Figure 2

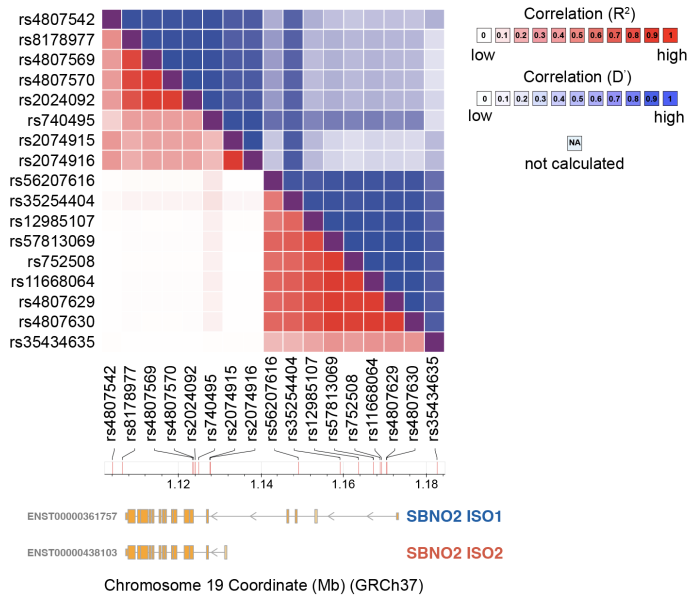

Supplementary Figure 2: LDlink linkage disequilibrium analysis of variants in *SBNO2* with GWAS-based association with IBD/CD.

# Supplementary Figure 3

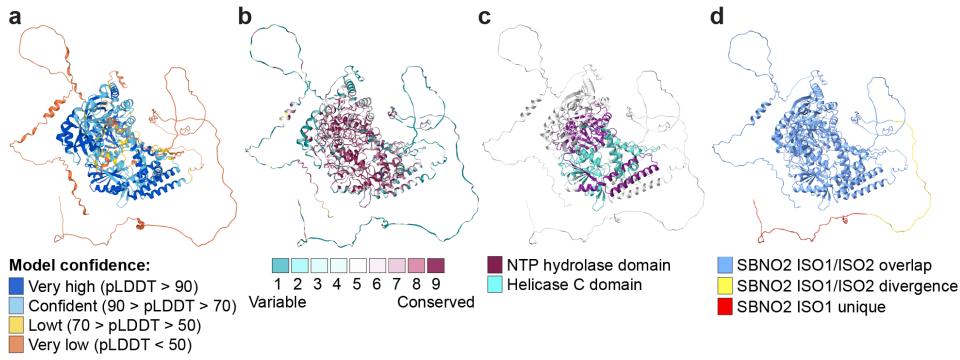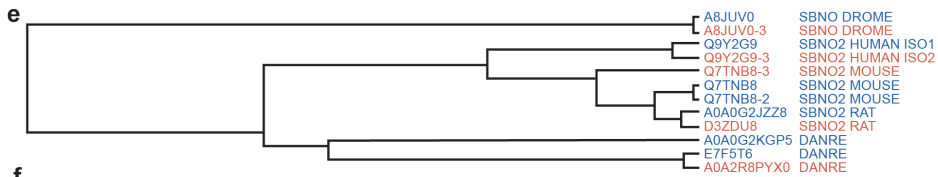

**f**

|            |                  |     |                                                                |     |
|------------|------------------|-----|----------------------------------------------------------------|-----|
| Q7TNB8     | SBNO2 MOUSE      | 1   | -----MLAVEPTMDGDFPPHEL-PPP                                     | 20  |
| Q7TNB8-2   | SBNO2 MOUSE      | 1   | -----MLAVEPTMDGDFPPHEL-PPP                                     | 20  |
| Q7TNB8-3   | SBNO2 MOUSE      | 1   | -----MLAVEPTMDGDFPPHEL-PPP                                     | 0   |
| Q9Y2G9     | SBNO2 HUMAN ISO1 | 1   | -----MLAVGPAMDRDYPQHEP-PPA                                     | 20  |
| Q9Y2G9-3   | SBNO2 HUMAN ISO2 | 1   | -----MLAVGPAMDRDYPQHEP-PPA                                     | 0   |
| A0A0G2JZZ8 | SBNO2 RAT        | 1   | -----MPTLATSVVMDTEDYLHPEGPQL                                   | 23  |
| D3ZDU8     | SBNO2 RAT        | 1   | -----MLAVEPTMDGDFPPHEL-PPP                                     | 20  |
| E7F5T6     | DANRE            | 1   | -----MLAVEPTMDGDFPPHEL-PPP                                     | 0   |
| A0A0G2KGP5 | DANRE            | 1   | -----MPSLSIIPPAMDGHFSFSNSVGPQL                                 | 23  |
| A0A2R8PYX0 | DANRE            | 1   | -----MPSLSIIPPAMDGHFSFSNSVGPQL                                 | 0   |
| A8JUV0     | SBNO DROME       | 181 | KLNNMVTAMGSPAARSSGNAGTTGSSQGGATGSTSSYLNSLITNELMNLAAAYVAA-----  | 235 |
| A8JUV0-3   | SBNO DROME       | 181 | KLNNMVT-----                                                   | 187 |
|            |                  |     |                                                                |     |
| Q7TNB8     | SBNO2 MOUSE      | 21  | GG--GI---QLQNRLL---HCPWWSGFSFSL---YPTFSSNQFVVGSTPFLGGQSC       | 66  |
| Q7TNB8-2   | SBNO2 MOUSE      | 21  | GG--GI---QLQNRLL---HCPWWSGFSFSL---YPTFSSNQFVVGSTPFLGGQSC       | 66  |
| Q7TNB8-3   | SBNO2 MOUSE      | 1   | -----MSQ---LRFWLQFAALNKDPPSCLEDLSNASV---FSSVDSLSIDIPDTPD---    | 44  |
| Q9Y2G9     | SBNO2 HUMAN ISO1 | 21  | GS---LLYSPPLIQSAML---HCPYWNFTSLFP---YPAFSSDSDRPFMSASFLGSGQC    | 70  |
| Q9Y2G9-3   | SBNO2 HUMAN ISO2 | 1   | -----MREPLPGSASWGTGPGP---                                      | 17  |
| A0A0G2JZZ8 | SBNO2 RAT        | 24  | GSPKFSAPSPLTSSMESQLYQPNSWAYSQQAQYNQHYPMQSGRQLQ-----            | 70  |
| D3ZDU8     | SBNO2 RAT        | 21  | GG--GI---QLQNRLL---HCPWWSGFSFPL---YPTFSSNQFVVGSTPFLGGQSC       | 66  |
| E7F5T6     | DANRE            | 1   | -----MALLGDQN---                                               | 8   |
| A0A0G2KGP5 | DANRE            | 24  | DARGFVLATP---MSHVFNHWSFNQPFGLPCPAQSENQSS---CFNGVSD             | 70  |
| A0A2R8PYX0 | DANRE            | 1   | -----P-----                                                    | 0   |
| A8JUV0     | SBNO DROME       | 236 | --KGSNAPPPPPSTAANSVRHSPTGGIPN-----P-----GGNFFGGSAA             | 274 |
| A8JUV0-3   | SBNO DROME       | 188 | -----P-----                                                    | 187 |
|            |                  |     |                                                                |     |
| Q7TNB8     | SBNO2 MOUSE      | 67  | PETSYPTTATV---PSFFSKSSDFPQDPPSCLEDLSNASV---FSSVDSLSIDIPDTPD--- | 118 |
| Q7TNB8-2   | SBNO2 MOUSE      | 67  | PETSYPTTATV---PSFFSKSSDFPQDPPSCLEDLSNASV---FSSVDSLSIDIPDTPD--- | 118 |
| Q7TNB8-3   | SBNO2 MOUSE      | 1   | -----MSQ---LRFWLQFAALNKDPPSCLEDLSNASV---FSSVDSLSIDIPDTPD---    | 44  |
| Q9Y2G9     | SBNO2 HUMAN ISO1 | 71  | PDTSYAPVATA---SSLPKRTCDFAQDSSYFEDFSNISI---FSSVDSLSIDIVDTPD---  | 122 |
| Q9Y2G9-3   | SBNO2 HUMAN ISO2 | 18  | -----SAGTMSQ---LQLWLQFAALNKDSSYFEDFSNISI---FSSVDSLSIDIVDTPD--- | 65  |
| A0A0G2JZZ8 | SBNO2 RAT        | 71  | PTPFSMNLDSLDDIFHELVNRGDFSQELPCTDEV---ASL---FSSPDSLSLEYPEP-S--- | 122 |
| D3ZDU8     | SBNO2 RAT        | 67  | PETSYPTTATV---PSFFSKSSDFPQDPPSCLEDLSNASV---FSSVDSLSIDIPDTPD--- | 118 |
| E7F5T6     | DANRE            | 9   | ---SFTVPCGI-----PTLGVQDPPSCLEDLSNASV---FSSVDSLSIDIPDTPD---     | 51  |
| A0A0G2KGP5 | DANRE            | 71  | MHTDLLPQDLNDFDSGL---DLFQDLSCLEDLQ---LI---FSPQDLSSEYAST-N---    | 117 |
| A0A2R8PYX0 | DANRE            | 1   | ---MSLMQIWKLYAQLGR---PPFDLSCLEDLQ---LI---FSPQDLSSEYAST-N---    | 45  |
| A8JUV0     | SBNO DROME       | 275 | ASTSASAAN-FNMAASLL-----AQMSYAGGASQTRALKVAGNIGCVGNQKPPPIAT      | 326 |
| A8JUV0-3   | SBNO DROME       | 188 | -----VSYAGGASQTRALKVAGNIGCVGNQKPPPIAT                          | 220 |
|            |                  |     |                                                                |     |
| Q7TNB8     | SBNO2 MOUSE      | 119 | -----FLQADSL-----NEVPTIWDV-----STTSTTHDKLFIIPSGPFSAP--         | 154 |
| Q7TNB8-2   | SBNO2 MOUSE      | 119 | -----FLQADSL-----NEVPTIWDV-----STTSTTHDKLFIIPSGPFSAP--         | 154 |
| Q7TNB8-3   | SBNO2 MOUSE      | 45  | -----FLQADSL-----NEVPTIWDV-----STTSTTHDKLFIIPSGPFSAP--         | 80  |
| Q9Y2G9     | SBNO2 HUMAN ISO1 | 123 | -----FLPADSL-----NQVSTIWD-----NPAPSTHDKLFIIPSGPFSAP--          | 158 |
| Q9Y2G9-3   | SBNO2 HUMAN ISO2 | 66  | -----FLPADSL-----NQVSTIWD-----NPAPSTHDKLFIIPSGPFSAP--          | 101 |
| A0A0G2JZZ8 | SBNO2 RAT        | 123 | -----GFGTDSLALQLTGEGPAAQMYWDI-----PGHSQRPLN-----LSAFPFG--      | 160 |
| D3ZDU8     | SBNO2 RAT        | 119 | -----FLPADSL-----NEVPTIWDV-----STTSTTRDKLFIIPSGPFSAL--         | 154 |
| E7F5T6     | DANRE            | 52  | -----FLPADSL-----NEVPTIWDV-----STTSTTRDKLFIIPSGPFSAL--         | 87  |
| A0A0G2KGP5 | DANRE            | 118 | -----FLNA-----DMAPTPTIWDI-----KTPAPVQES-----SNRFGGLN--         | 150 |
| A0A2R8PYX0 | DANRE            | 46  | -----FLNA-----DMAPTPTIWDI-----KTPAPVQES-----SNRFGGLN--         | 78  |
| A8JUV0     | SBNO DROME       | 327 | TPGSGGAGGAGGSGVKGNNMSMEAVQKLIAMNPEYLTSGIPNTVFQMFQMSQRQATP      | 386 |
| A8JUV0-3   | SBNO DROME       | 221 | TPGSGGAGGAGGSGVKGNNMSMEAVQKLIAMNPEYLTSGIPNTVFQMFQMSQRQATP      | 280 |
|            |                  |     |                                                                |     |
| Q7TNB8     | SBNO2 MOUSE      | 155 | --EDPV--TSLSTPLLSISYQ-SH---SQPEEEEGEEDDEEELGHAEITYADYVPSKSKI   | 206 |
| Q7TNB8-2   | SBNO2 MOUSE      | 155 | --EDPV--TSLSTPLLSISYQ-SH---SQPEEEEGEEDDEEELGHAEITYADYVPSKSKI   | 206 |
| Q7TNB8-3   | SBNO2 MOUSE      | 81  | --EDPV--TSLSTPLLSISYQ-SH---SQPEEEEGEEDDEEELGHAEITYADYVPSKSKI   | 132 |
| Q9Y2G9     | SBNO2 HUMAN ISO1 | 159 | --EDFI--PS-HSTPLLSVSYQ-EQSVQSQPEEEDAEAEAEAEAEIHTETIYADYVPSKSKI | 212 |
| Q9Y2G9-3   | SBNO2 HUMAN ISO2 | 102 | --EDFI--PS-HSTPLLSVSYQ-EQSVQSQPEEEDAEAEAEAEAEIHTETIYADYVPSKSKI | 155 |
| A0A0G2JZZ8 | SBNO2 RAT        | 161 | -RLDEL--NAIL-SPSVAGFKAAAAPAPPEEEDAEAEAEAEAEIHTETIYADYVPSKSKI   | 216 |
| D3ZDU8     | SBNO2 RAT        | 155 | --EDPV--TAVSSTPLLSVSYQ-SH---SQPEEEEGEEDDEEELGHAEITYADYVPSKSKI  | 206 |
| E7F5T6     | DANRE            | 88  | --EDPV--TAVSSTPLLSVSYQ-SH---SQPEEEEGEEDDEEELGHAEITYADYVPSKSKI  | 139 |
| A0A0G2KGP5 | DANRE            | 151 | -SLDDI--SAIINTPIGGY--QRPTQPEEEEDVVEEAEELGHVDTIYADYVPSKSKI      | 204 |
| A0A2R8PYX0 | DANRE            | 79  | -SLDDI--SAIINTPIGGY--QRPTQPEEEEDVVEEAEELGHVDTIYADYVPSKSKI      | 132 |
| A8JUV0     | SBNO DROME       | 387 | SPNCPMNPAMVTSAAAA---AAHASAVAYVQEEEDVVEEAEELGHVDTIYADYVPAKLLK   | 442 |
| A8JUV0-3   | SBNO DROME       | 281 | SPNCPMNPAMVTSAAAA---AAHASAVAYVQEEEDVVEEAEELGHVDTIYADYVPAKLLK   | 336 |

Supplementary Figure 3: SBNO2 structural and phylogenetic analysis. (a) AF-Q9Y2G9-F1 alpha fold artificial intelligence-based prediction of the human SBNO2 ISO1 structure. The colour indicates the confidence of prediction. (b) ConSurf-based prediction of SBNO2 phylogenetic conservation visualised on the AF-Q9Y2G9-F1 model. (c) Visualisation of SBNO2 NTP hydrolase domain (purple) and Helicase C domain (turquoise), and (d) visualisation of differences in SBNO2 ISO1 and SBNO2 ISO2 protein sequence using the AF-Q9Y2G9-F1 model. (e) Phylogenetic tree of SBNO2 isoforms across selected species. (f) Multiple sequence alignment of protein sequences of select SBNO2 isoforms according to (e). Amino acid 1 – 212 of human SBNO2 ISO1 (QY92G9) and corresponding residues of selected species are shown.

# Supplementary Figure 4

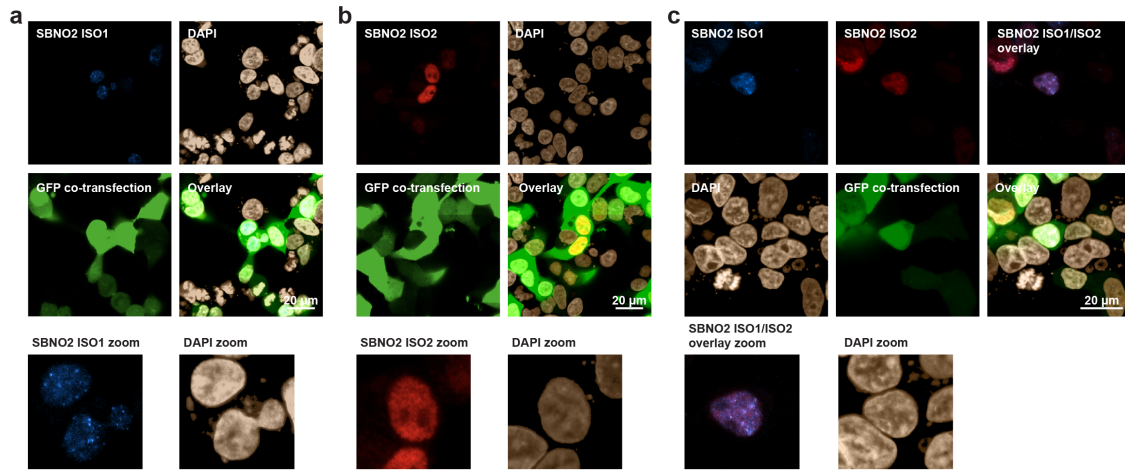

Supplementary Figure 4: Analyses of ectopic SBNO2 isoform expression and localization in HEK293 cells. (a-c) Confocal microscopy images of HEK293 cells expressing Myc-tagged SBNO2 ISO1 (cyan hot) (a), HA-tagged SBNO2 ISO2 (red) (b), and co-transfected HEK293 cells expressing both SBNO2 isoforms (c). Nuclear DAPI staining and co-transfected GFP fluorescence signals are shown in sepia and green colour respectively. Source data are provided as a Source Data file for Supplementary Figures 4a-c.



Supplementary Table 1: RISK cohort patient information.

|              | No IBD |      |       | CD non inflamed |      |       | CD microscopic inflammation |      |       | CD macroscopic inflammation |      |       |
|--------------|--------|------|-------|-----------------|------|-------|-----------------------------|------|-------|-----------------------------|------|-------|
|              | Age    | Sex  | BMI   | Age             | Sex  | BMI   | Age                         | Sex  | BMI   | Age                         | Sex  | BMI   |
| Minimum      | 4.5    |      | 12.59 | 7.833           |      | 13.61 | 2.25                        |      | 12.98 | 5.083                       |      | 12.78 |
| 1st Quartile | 10.44  |      | 16.52 | 10.38           |      | 14.29 | 10.77                       |      | 16.03 | 10.67                       |      | 14.69 |
| Median       | 12.88  |      | 19.54 | 11.5            |      | 16.3  | 13.04                       |      | 17.8  | 12.42                       |      | 16.43 |
| Mean         | 12.37  |      | 20.49 | 12.07           |      | 16.86 | 12.67                       |      | 18.45 | 12.45                       |      | 17.36 |
| 3rd Quartile | 14.85  |      | 23.51 | 13.79           |      | 18.4  | 15.21                       |      | 20.35 | 14.58                       |      | 19.01 |
| Maximum      | 18     |      | 33.24 | 16.58           |      | 23.75 | 16.92                       |      | 25.27 | 16.83                       |      | 36.46 |
| Male         |        | n=38 |       |                 | n=17 |       |                             | n=14 |       |                             | n=93 |       |
| Female       |        | n=28 |       |                 | n=8  |       |                             | n=10 |       |                             | n=50 |       |

## Supplementary Figure 5

**a**

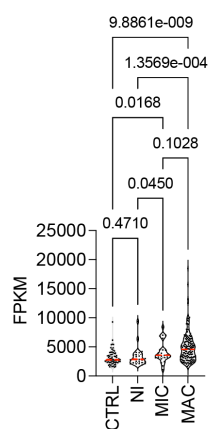

CTRL: No IBD  
 NI: CD not inflamed  
 MIC: CD microscopic inflammation  
 MAC: CD macroscopic inflammation

**b**

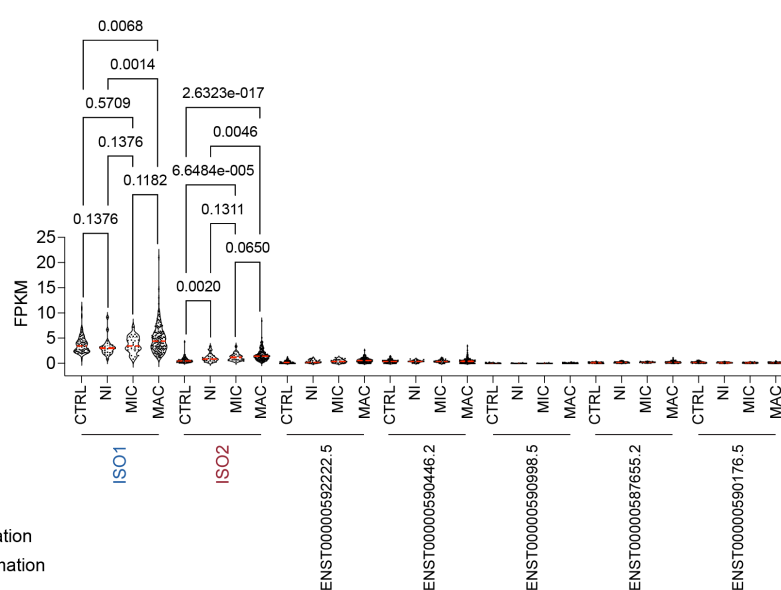

Supplementary Figure 5: *SBNO2* gene and isoform-level expression in intestinal biopsies from healthy individuals and patients with CD. (a) RNA sequencing-based estimation of *SBNO2* gene expression (non-parametric, two-sided, Kruskal-Wallis test) and (b) *SBNO2* isoforms expression in the RISK cohort data expressed as fragments per kilobase of exon per million mapped fragments (FPKM) (non-parametric, two-sided, Kruskal-Wallis test). Source data are provided as a Source Data file for Supplementary Figures 5a and b.

# Supplementary Figure 6

SBNO2

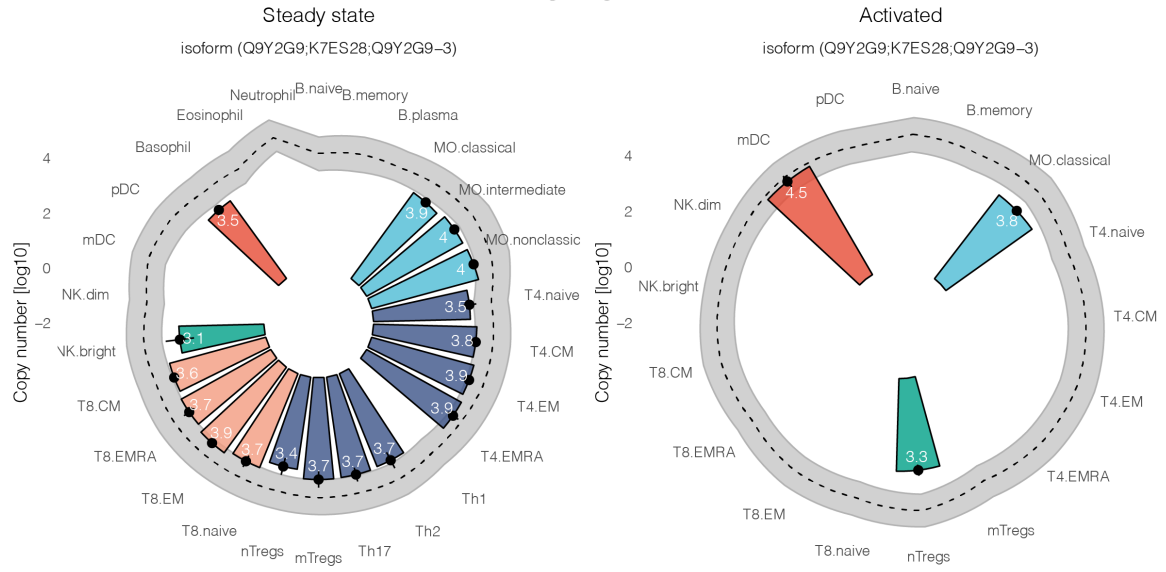

Supplementary Figure 6: Analyses of SBNO2 protein expression peripheral blood immune cells. Absolute protein copy numbers (log10) from high-sensitivity mass spectrometry quantification of SBNO2 in FACS-sorted peripheral blood immune cell types, in steady state and following stimulation (activated)<sup>27</sup>. The grey ribbon corresponds to the interquartile range of protein expression for all analytes in each cell.

# Supplementary Figure 7

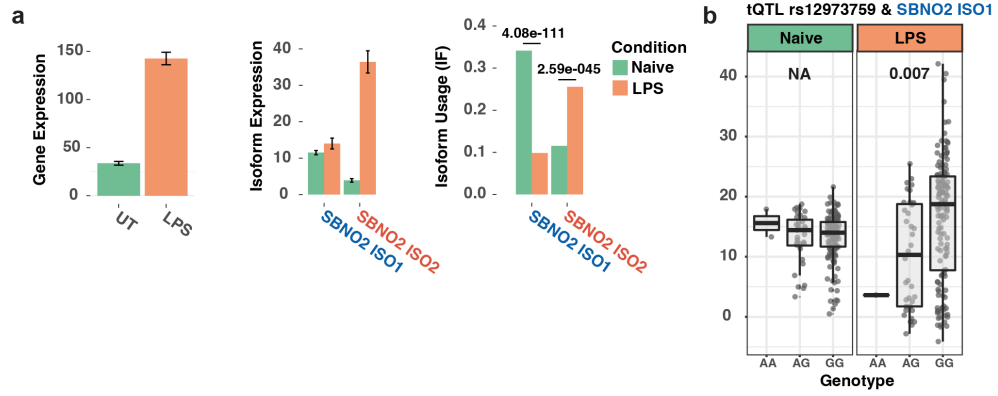

Supplementary Figure 7: *SBNO2* gene and isoform level expression in primary human monocytes. (a) *SBNO2* gene expression, *SBNO2* ISO1 and *SBNO2* ISO2 expression, and *SBNO2* ISO1 and *SBNO2* ISO2 isoform usage in resting and 24 hrs LPS-stimulated primary human monocytes (n = 176, we applied the IsoformSwitchAnalyzeR tool to analyse isoform usage in naïve and treated monocytes with LPS. Isoform usage refers to the fraction value of the mean isoform expression given the mean expression of the corresponding gene in a setting with k biological replicates). (b) Example of a variant (rs12973759) with a tQTL specifically affecting *SBNO2* ISO1 expression in LPS-stimulated CD14<sup>+</sup> monocytes. Box plots depict the interquartile range as the lower and upper bounds, respectively. The whiskers represent minimum and maximum, and the centre depicts the median. eQTL analysis was performed with the FastQTL and QTLtools using a linear regression. To allow comparison with output of the regression model the optimal number of PC was used to regress out expression changes attributable to the effect of the non-genetic covariates in local association plots. Source data are provided as a Source Data file for Supplementary Figures 7a and b.

Supplementary Table 2: Information on healthy individuals recruited via the Oxford Biobank (n = 176).

|                     | <b>Age</b> | <b>Sex</b> | <b>BMI</b> |
|---------------------|------------|------------|------------|
| <b>Minimum</b>      | 31         |            | 17.43      |
| <b>1st Quartile</b> | 35         |            | 22.19      |
| <b>Median</b>       | 49         |            | 24.29      |
| <b>Mean</b>         | 47.22      |            | 25.19      |
| <b>3rd Quartile</b> | 57         |            | 26.98      |
| <b>Maximum</b>      | 66         |            | 43.04      |
| <b>Male</b>         |            | n=60       |            |
| <b>Female</b>       |            | n=116      |            |



# Supplementary Figure 8

**a**

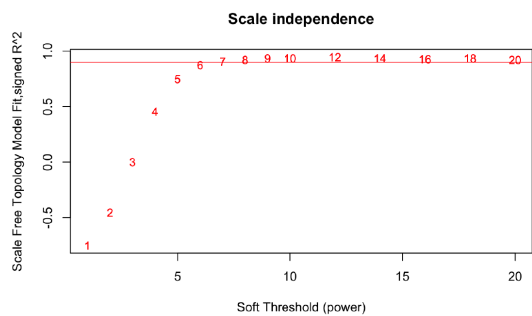

**b**

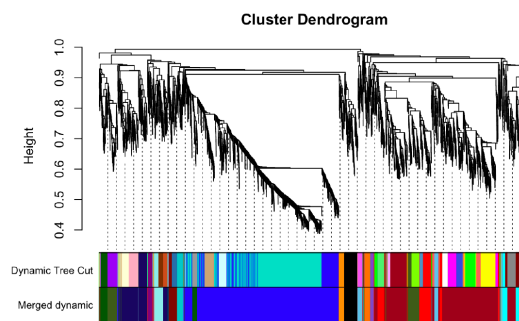

**c**

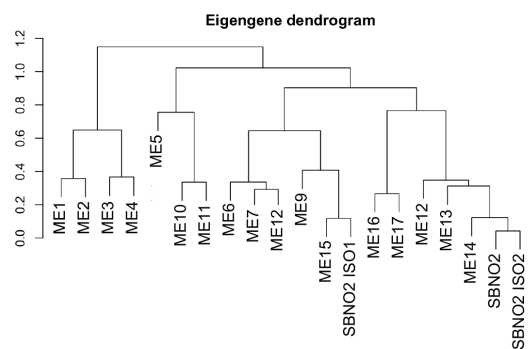

Supplementary Figure 8: WGCNA analysis of RNA-seq data generated from unstimulated, IL-10-, LPS, and LPS + aIL10R-stimulated MDM. (a) WGCNA soft power plot. (b) Cluster dendrogram. (c) Eigengene dendrogram including genes and transcripts of interest: *SBNO2*, *SBNO2* ISO1, and *SBNO2* ISO2.

Supplementary Table 3: Summary of MAGMA<sup>33</sup>-based gene-set heritability analysis.

| IBD      |      |        |             |              |          |           |                |
|----------|------|--------|-------------|--------------|----------|-----------|----------------|
| VARIABLE | TYPE | NGENES | BETA        | BETA_STD     | SE       | P         | -LOG10(pvalue) |
| ME1      | SET  | 918    | 0.091263    | 0.019998     | 0.031429 | 0.0018458 | 2.733815358    |
| ME2      | SET  | 235    | 0.05913     | 0.0066842    | 0.063221 | 0.17483   | 0.757384042    |
| ME3      | SET  | 252    | 0.080271    | 0.0093921    | 0.057515 | 0.081419  | 1.089274236    |
| ME4      | SET  | 305    | -0.012925   | -0.0016613   | 0.054697 | 0.5934    | 0.226652458    |
| ME5      | SET  | 53     | 0.23633     | 0.012752     | 0.13181  | 0.036496  | 1.437754732    |
| ME6      | SET  | 61     | -0.0060427  | -0.00034971  | 0.11719  | 0.52056   | 0.283529206    |
| ME7      | SET  | 118    | -0.062614   | -0.0050319   | 0.081982 | 0.77749   | 0.109305188    |
| ME8      | SET  | 50     | -0.15116    | -0.0079225   | 0.13264  | 0.87277   | 0.05910019     |
| ME9      | SET  | 120    | 0.21039     | 0.01705      | 0.089683 | 0.0094944 | 2.022532475    |
| ME10     | SET  | 153    | 0.13018     | 0.011902     | 0.077989 | 0.047542  | 1.32292252     |
| ME11     | SET  | 38     | 0.2006      | 0.0091689    | 0.14706  | 0.086274  | 1.064120066    |
| ME12     | SET  | 97     | 0.060824    | 0.0044344    | 0.094536 | 0.25999   | 0.585043356    |
| ME13     | SET  | 33     | 0.096503    | 0.0041109    | 0.18115  | 0.29712   | 0.527068114    |
| ME14     | SET  | 82     | 0.12018     | 0.0080594    | 0.11393  | 0.14575   | 0.836391437    |
| ME15     | SET  | 1438   | 0.1419      | 0.038324     | 0.026382 | 3.80E-08  | 7.41982798     |
| ME16     | SET  | 40     | -0.041376   | -0.0019401   | 0.14555  | 0.6119    | 0.213319547    |
| ME17     | SET  | 93     | 0.032885    | 0.0023478    | 0.095212 | 0.3649    | 0.437826137    |
| CD       |      |        |             |              |          |           |                |
| VARIABLE | TYPE | NGENES | BETA        | BETA_STD     | SE       | P         | -LOG10(pvalue) |
| ME1      | SET  | 918    | 0.070448    | 0.015439     | 0.030936 | 0.011394  | 1.943323785    |
| ME2      | SET  | 235    | 0.057781    | 0.0065328    | 0.062689 | 0.17834   | 0.748751238    |
| ME3      | SET  | 252    | 0.076924    | 0.0090019    | 0.055966 | 0.084657  | 1.072337126    |
| ME4      | SET  | 305    | -0.023835   | -0.003064    | 0.054534 | 0.66896   | 0.17459985     |
| ME5      | SET  | 53     | 0.063144    | 0.0034076    | 0.1295   | 0.31292   | 0.504566678    |
| ME6      | SET  | 61     | -0.15992    | -0.0092565   | 0.11426  | 0.91917   | 0.036604159    |
| ME7      | SET  | 118    | -0.0050225  | -0.0004037   | 0.081024 | 0.52471   | 0.280080659    |
| ME8      | SET  | 50     | -0.01468    | -0.00076951  | 0.13234  | 0.54416   | 0.264273385    |
| ME9      | SET  | 120    | 0.12528     | 0.010154     | 0.090237 | 0.082528  | 1.08339868     |
| ME10     | SET  | 153    | 0.076462    | 0.0069914    | 0.075688 | 0.1562    | 0.80631897     |
| ME11     | SET  | 38     | 0.1205      | 0.0055087    | 0.14354  | 0.2006    | 0.697669071    |
| ME12     | SET  | 97     | 0.18849     | 0.013744     | 0.0879   | 0.016008  | 1.795662924    |
| ME13     | SET  | 33     | 0.38933     | 0.016588     | 0.18343  | 0.016907  | 1.771933447    |
| ME14     | SET  | 82     | 0.0042318   | 0.00028383   | 0.10963  | 0.4846    | 0.31461659     |
| ME15     | SET  | 1438   | 0.09979     | 0.026956     | 0.026036 | 6.36E-05  | 4.196816111    |
| ME16     | SET  | 40     | 0.049797    | 0.0023354    | 0.15539  | 0.37431   | 0.42676857     |
| ME17     | SET  | 93     | 0.16664     | 0.011899     | 0.092567 | 0.035927  | 1.444579046    |
| UC       |      |        |             |              |          |           |                |
| VARIABLE | TYPE | NGENES | BETA        | BETA_STD     | SE       | P         | -LOG10(pvalue) |
| ME1      | SET  | 918    | 0.05496     | 0.012046     | 0.029513 | 0.031291  | 1.504580557    |
| ME2      | SET  | 235    | 0.0060121   | 0.00067979   | 0.058251 | 0.4589    | 0.338281942    |
| ME3      | SET  | 252    | 0.032884    | 0.0038485    | 0.052979 | 0.2674    | 0.572838597    |
| ME4      | SET  | 305    | 0.04416     | 0.0056773    | 0.052271 | 0.19911   | 0.700906928    |
| ME5      | SET  | 53     | 0.22172     | 0.011966     | 0.12522  | 0.038323  | 1.416540501    |
| ME6      | SET  | 61     | 0.039947    | 0.0023124    | 0.10657  | 0.35389   | 0.451131709    |
| ME7      | SET  | 118    | 0.031772    | 0.002554     | 0.078617 | 0.34306   | 0.464629917    |
| ME8      | SET  | 50     | -0.15595    | -0.0081757   | 0.12574  | 0.89256   | 0.04936258     |
| ME9      | SET  | 120    | 0.14046     | 0.011386     | 0.085852 | 0.050917  | 1.293137193    |
| ME10     | SET  | 153    | 0.10037     | 0.0091785    | 0.072839 | 0.084108  | 1.075162694    |
| ME11     | SET  | 38     | 0.14439     | 0.006601     | 0.1367   | 0.14544   | 0.837316134    |
| ME12     | SET  | 97     | -0.11286    | -0.0082303   | 0.087245 | 0.90209   | 0.044750131    |
| ME13     | SET  | 33     | -0.038694   | -0.0016487   | 0.17146  | 0.58927   | 0.229685668    |
| ME14     | SET  | 82     | 0.13138     | 0.0088125    | 0.10591  | 0.10741   | 0.968955283    |
| ME15     | SET  | 1438   | 0.078853    | 0.021302     | 0.024584 | 6.71E-04  | 3.17357531     |
| ME16     | SET  | 40     | 0.10553     | 0.0049498    | 0.1434   | 0.23089   | 0.636594876    |
| ME17     | SET  | 93     | -0.00021387 | -0.000015273 | 0.088658 | 0.50096   | 0.30019695     |

## Supplementary Figure 9

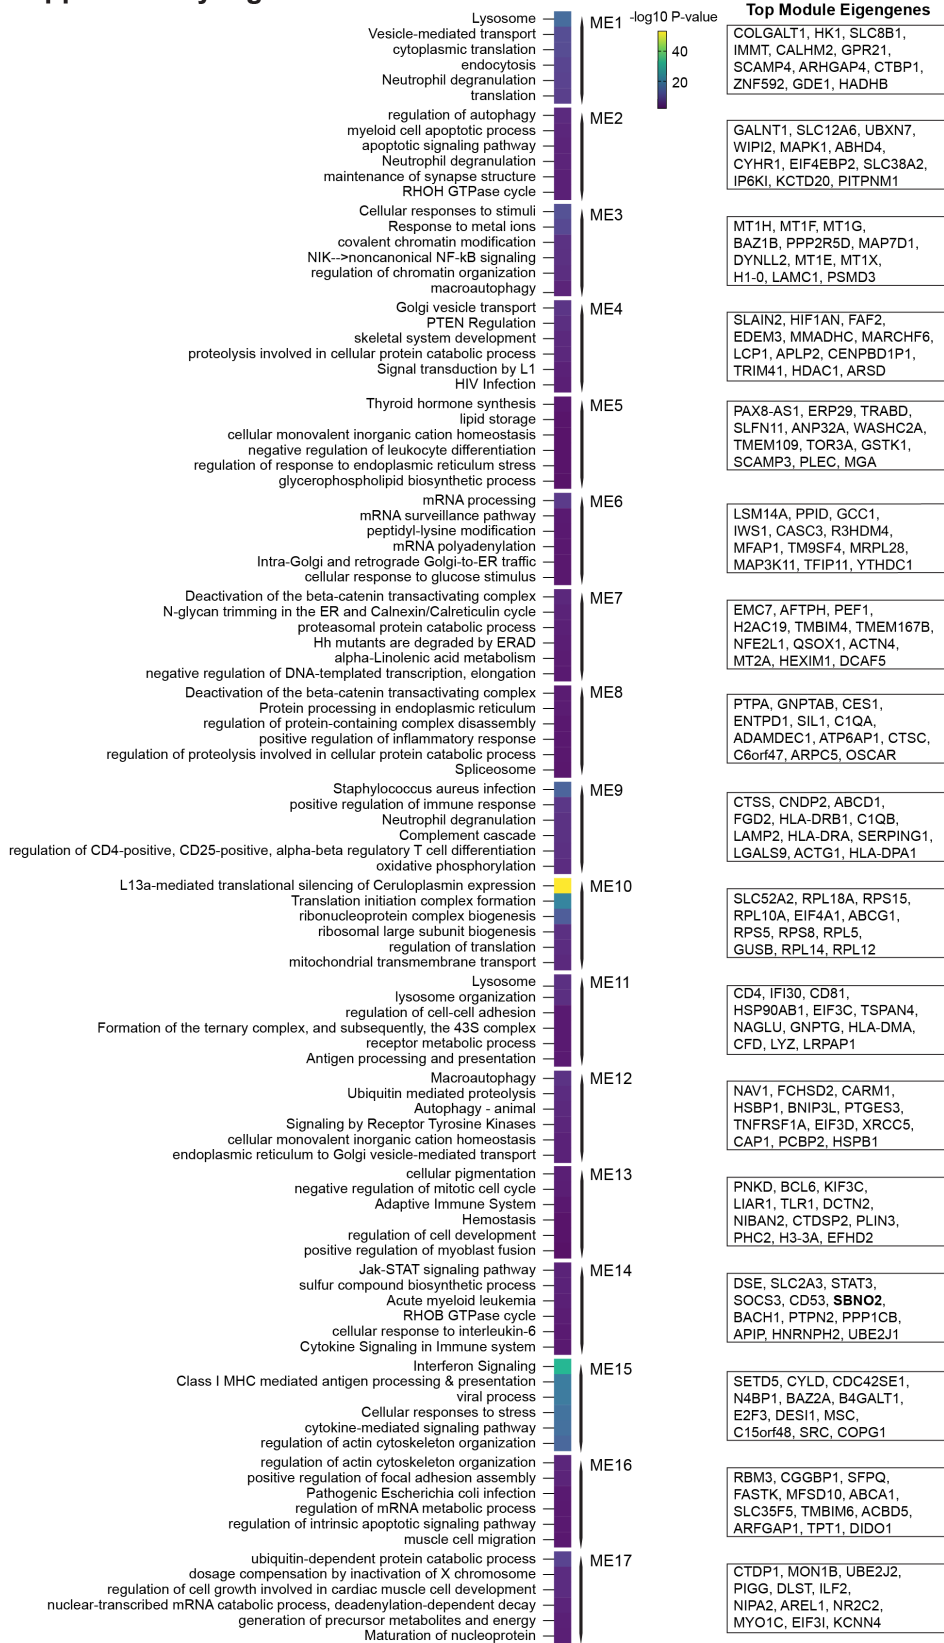

Supplementary Figure 9: Pathway analysis of WGCNA gene modules identified in unstimulated, IL-10-, LPS, and LPS + aIL10R-stimulated MDM. Metascape enrichment of KEGG, Reactome, and GO pathway terms based on those gene modules that were identified in unstimulated MDM and 8 hrs IL-10 (100 ng/mL), LPS (200 ng/mL), or LPS + aIL-10R (200 ng/mL, 10  $\mu$ g/mL) stimulated MDM (hypergeometric test, Bonferroni correction,  $p_{adj} < 0.05$ ). Genes listed on the right represent the respective top 12 correlated module eigengenes. Source data are provided as a Source Data file for Supplementary Figure 9.

# Supplementary Figure 10

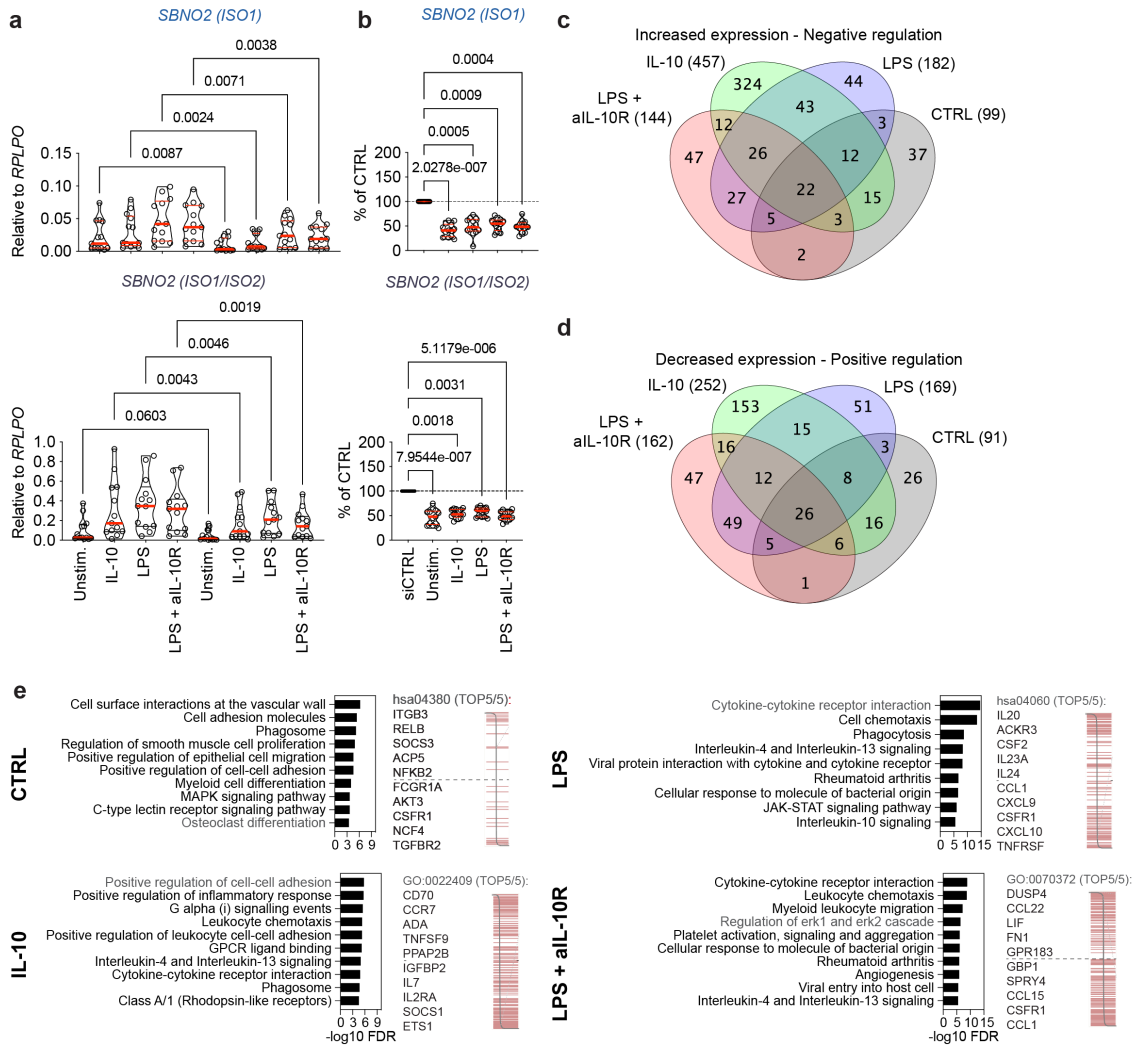

Supplementary Figure 10: siRNA-mediated knockdown of SBNO2 in primary human MDM. (a and b) RT-qPCR analysis of *SBNO2* ISO1 (a) and *SBNO2* ISO1/ISO2 (b) expression in primary human MDM shown as relative expression to *RPLPO* (left) and fold change to control siRNA-treated MDM (right) (Independent experiments/donors: n = 6/13; non-parametric, two-sided, Friedman test). (c and d) Venn diagrams show the numbers of significantly ( $\log_2$  fold change > 0.25,  $p_{adj} < 0.05$ , FDR) differentially up-regulated (c) and down-regulated (d) genes upon knockdown of *SBNO2* in MDM (n=3) comparing unstimulated (CTRL), IL-10- (100 ng/mL), LPS- (200 ng/mL), or LPS+aIL-10R-treated (200 ng/mL, 10  $\mu$ g/mL) conditions by RNA-seq and DESeq2 (n=3). (e) STRING functional enrichment analysis showing the top 10 enriched pathways (GO Biologic Process, KEGG Pathways, Reactome Pathways) with dual distribution based on DESeq2 differential expression ranking and functional enrichment analysis false discovery rate. Each one selected pathway is highlighted. The respective top 5 SBNO2 knockdown upregulated and top 5 SBNO2 knockdown downregulated (FDR) pathway genes are listed and the distribution according to  $\log_2$  fold change expression across the dataset visualized. Source data are provided as a Source Data file for Supplementary Figures 10a and b.

# Supplementary Figure 11

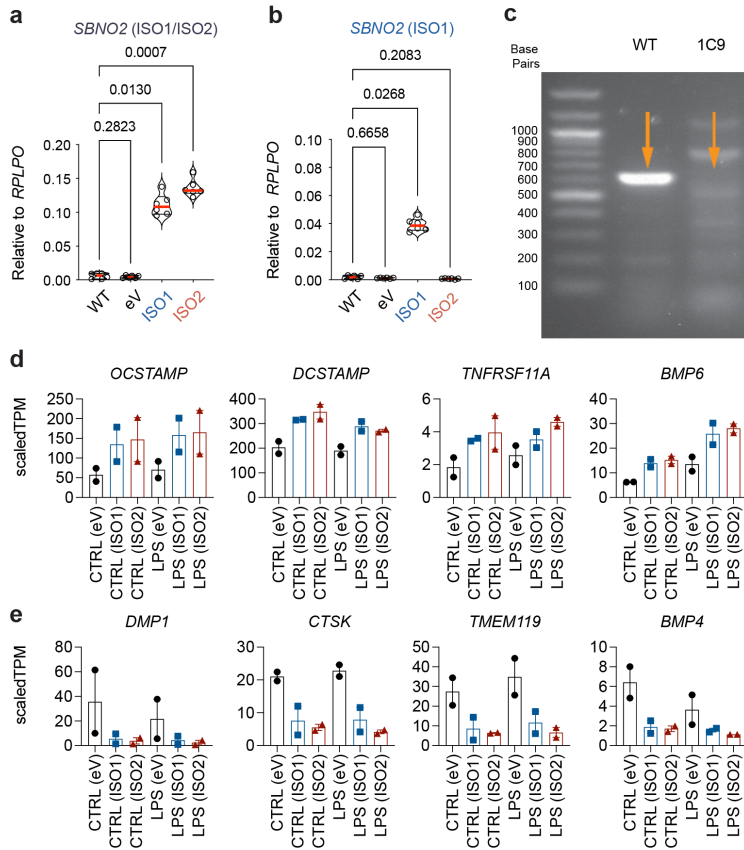



Supplementary Figure 11: Ectopic expression and CRISPR-Cas9-mediated knockout of SBNO2 in the THP-1 cell line. (a and b) RT-qPCR analysis of (a) *SBNO2* ISO1/ISO2, and (b) *SBNO2* ISO1 expression in lentivirus transduced, GFP<sup>+</sup>-sorted, and PMA-differentiated THP-1 MDM (Independent experiments/replicates: n = 2/6, non-parametric, two-sided, Kruskal-Wallis test). (c) Agarose gel image showing the results from a PCR amplification of genomic DNA of the CRISPR-Cas9-targeted *SBNO2* region in WT THP-1 monocytes and a THP-1 single cell clone (1C9). (d) Expression of *OCSTAMP*, *DCSTAMP*, *TNFRSF11A*, and *BMP6* in lentivirus-transduced (empty vector (eV), SBNO2 ISO1 (ISO1), and SBNO2 ISO2 (ISO2)) THP-1 MDM in steady state or following 8 hrs stimulation with 200 ng/mL LPS measured by RNA-seq (n = 2). (e) Expression of *DMP1*, *CTSK*, *TMEM119*, and *BMP4* according to (d) (n = 2). Source data are provided as a Source Data file for Supplementary Figures 11a-e.
