# Supplementary material for: An isoform quantitative trait locus in SBNO2 links genetic susceptibility to Crohn’s disease with defective antimicrobial activity
Source: PubMed Central journal article supplement (PMC11133462; doi:10.1038/s41467-024-47218-3), 2024-05-28
Supplement: 41467_2024_47218_MOESM3_ESM.pdf [file 41467_2024_47218_MOESM3_ESM.pdf]

## **Description of Additional Supplementary Files**

File Name: Supplementary Data 1

Description: Monocyte-derived macrophages in vitro stimulation - RNA sequencing-based WGCNA modules.

File Name: Supplementary Data 2

Description: siRNA-mediated knockdown of SBNO2 in Monocyte-derived macrophages - RNA sequencing and DESeq2-based differentially expressed genes.

File Name: Supplementary Data 3

Description: siRNA-mediated knockdown of SBNO2 in Monocyte-derived macrophages - Functional pathway enrichment analysis of RNA sequencing and DESeq2-based differentially expressed genes - Unstimulated condition.

File Name: Supplementary Data 4

Description: siRNA-mediated knockdown of SBNO2 in Monocyte-derived macrophages - Functional pathway enrichment analysis of RNA sequencing and DESeq2-based differentially expressed genes - IL-10-stimulated condition.

File Name: Supplementary Data 5

Description: siRNA-mediated knockdown of SBNO2 in Monocyte-derived macrophages - Functional pathway enrichment analysis of RNA sequencing and DESeq2-based differentially expressed genes - LPS-stimulated condition.

File Name: Supplementary Data 6

Description: siRNA-mediated knockdown of SBNO2 in Monocyte-derived macrophages - Functional pathway enrichment analysis of RNA sequencing and DESeq2-based differentially expressed genes - LPS+IL-10R-stimulated condition.
